# Supplementary material for: RFS+: A Clinically Adaptable and Computationally Efficient Strategy for Enhanced Brain Tumor Segmentation
Source: MDPI journal article supplement (doi:10.3390/cancers15235620), 2023-11-28
Supplement: s1 [file s1]

# Supplementary Materials: RFS+: A Clinically Adaptable and Computationally Efficient Strategy for Enhanced Brain Tumor Segmentation

Abdulkerim Duman, Oktay Karakuş, Xianfang Sun, Solly Thomas, James Powell and Emiliano Spezi

## RFS+ for each region

### A Normalization Techniques

For the BraTS dataset, several normalization techniques [1] are implemented in this study, categorized into two main types: individual time-point normalization methods and sample-based normalization methods. The individual time-point normalization methods incorporate Z-score normalization (zscore-normalize), Fuzzy C-means (FCM)-based tissue-based mean normalization (fcm-normalize), Kernel Density Estimate (KDE) WM mode normalization (kde-normalize), and WhiteStripe (ws-normalize). Meanwhile, the sample-based normalization methods include Least squares (LSQ) tissue mean normalization (lsq-normalize), Piecewise Linear Histogram Matching (nyul-normalize) except RAVEL (ravel-normalize) due to not applicable.

Table S1 shows the results of RFS+ on ET, TC, WT for each segmentation approach with variable normalization techniques.

**Table S1.** The results of RFS+ for ET, TC and WT.

| Intensity norm. tech | Segmentation Approach | ET    | TC    | WT    |
|----------------------|-----------------------|-------|-------|-------|
| Nyul                 | Multiclass            | 79.44 | 79.53 | 88.98 |
|                      | Multi-label           | 83.52 | 88.78 | 92.05 |
|                      | Binary class          | 84.21 | 89.42 | 90.30 |
| Z-score              | Multiclass            | 84.99 | 89.71 | 91.65 |
|                      | Multi-label           | 82.29 | 87.27 | 92.24 |
|                      | Binary class          | 85.19 | 89.48 | 92.18 |
| Whitestripe          | Multiclass            | 83.61 | 87.99 | 90.47 |
|                      | Multi-label           | 83.05 | 88.17 | 91.77 |
|                      | Binary class          | 84.12 | 88.24 | 91.83 |
| FCM                  | Multiclass            | 78.65 | 78.23 | 88.67 |
|                      | Multi-label           | 77.56 | 79.42 | 87.65 |
|                      | Binary class          | 83.65 | 84.21 | 88.53 |
| LSQ                  | Multiclass            | 78.59 | 78.04 | 87.32 |
|                      | Multi-label           | 79.34 | 80.11 | 86.59 |
|                      | Binary class          | 82.34 | 84.87 | 83.98 |
| KDE                  | Multiclass            | 79.22 | 77.45 | 88.67 |
|                      | Multi-label           | 81.03 | 78.66 | 87.45 |
|                      | Binary class          | 84.17 | 88.22 | 88.34 |

B. RFS+ Workflows for each region.

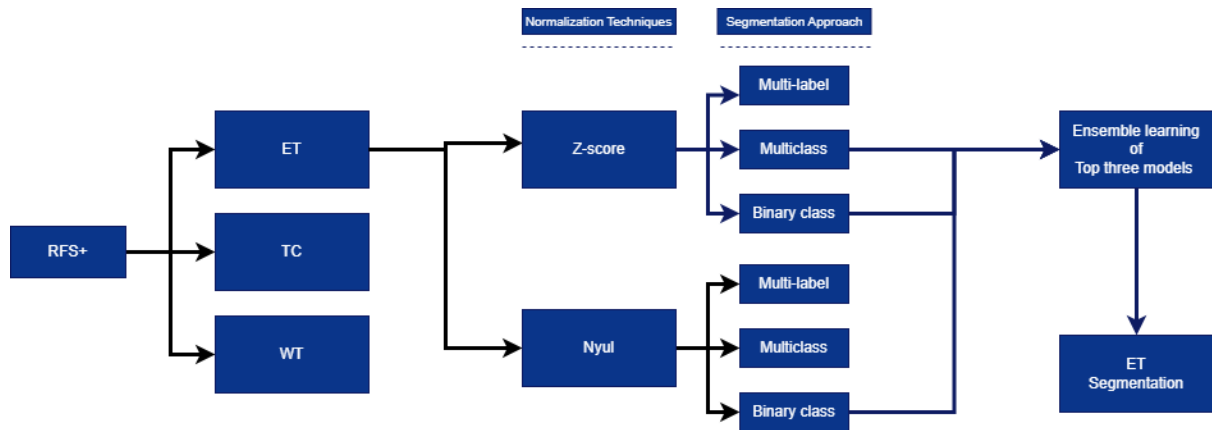

Figure S1. RFS+ for ET based on Table S1.

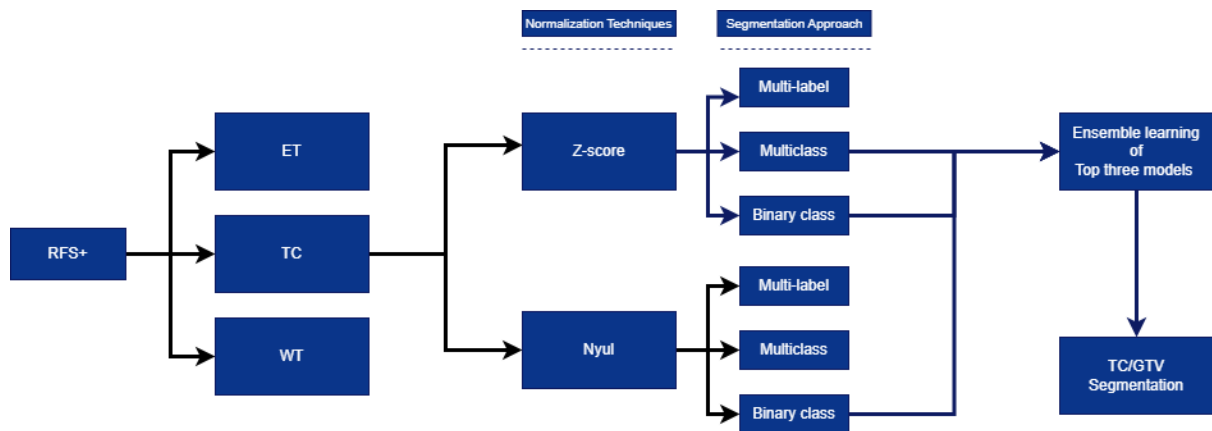

Figure S2. RFS+ for TC based on Table S1.

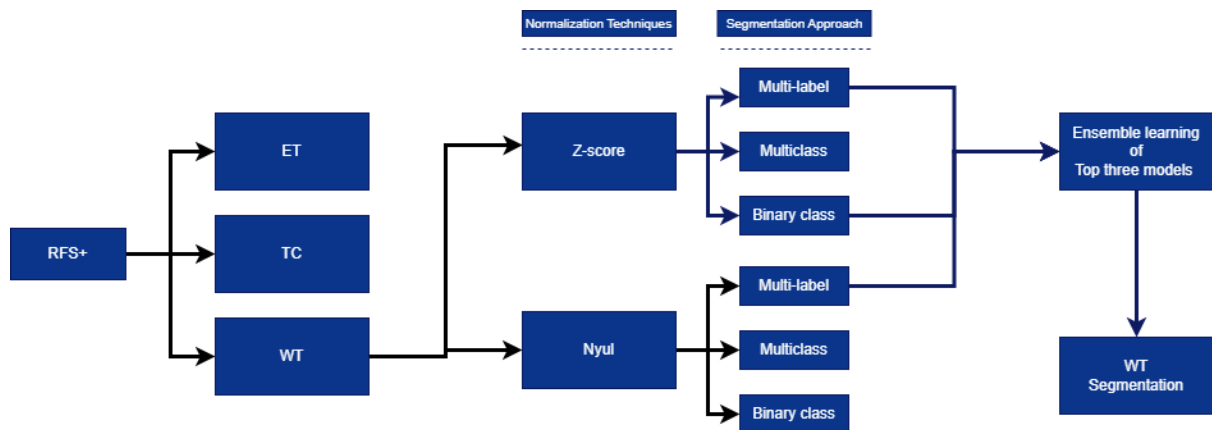

Figure S3. RFS+ for WT based on Table S1.

### C RFS+ with each segmentation approach for each region

Figure S4 shows each segmentation approaches with their respective inputs and RFS+ for ET.

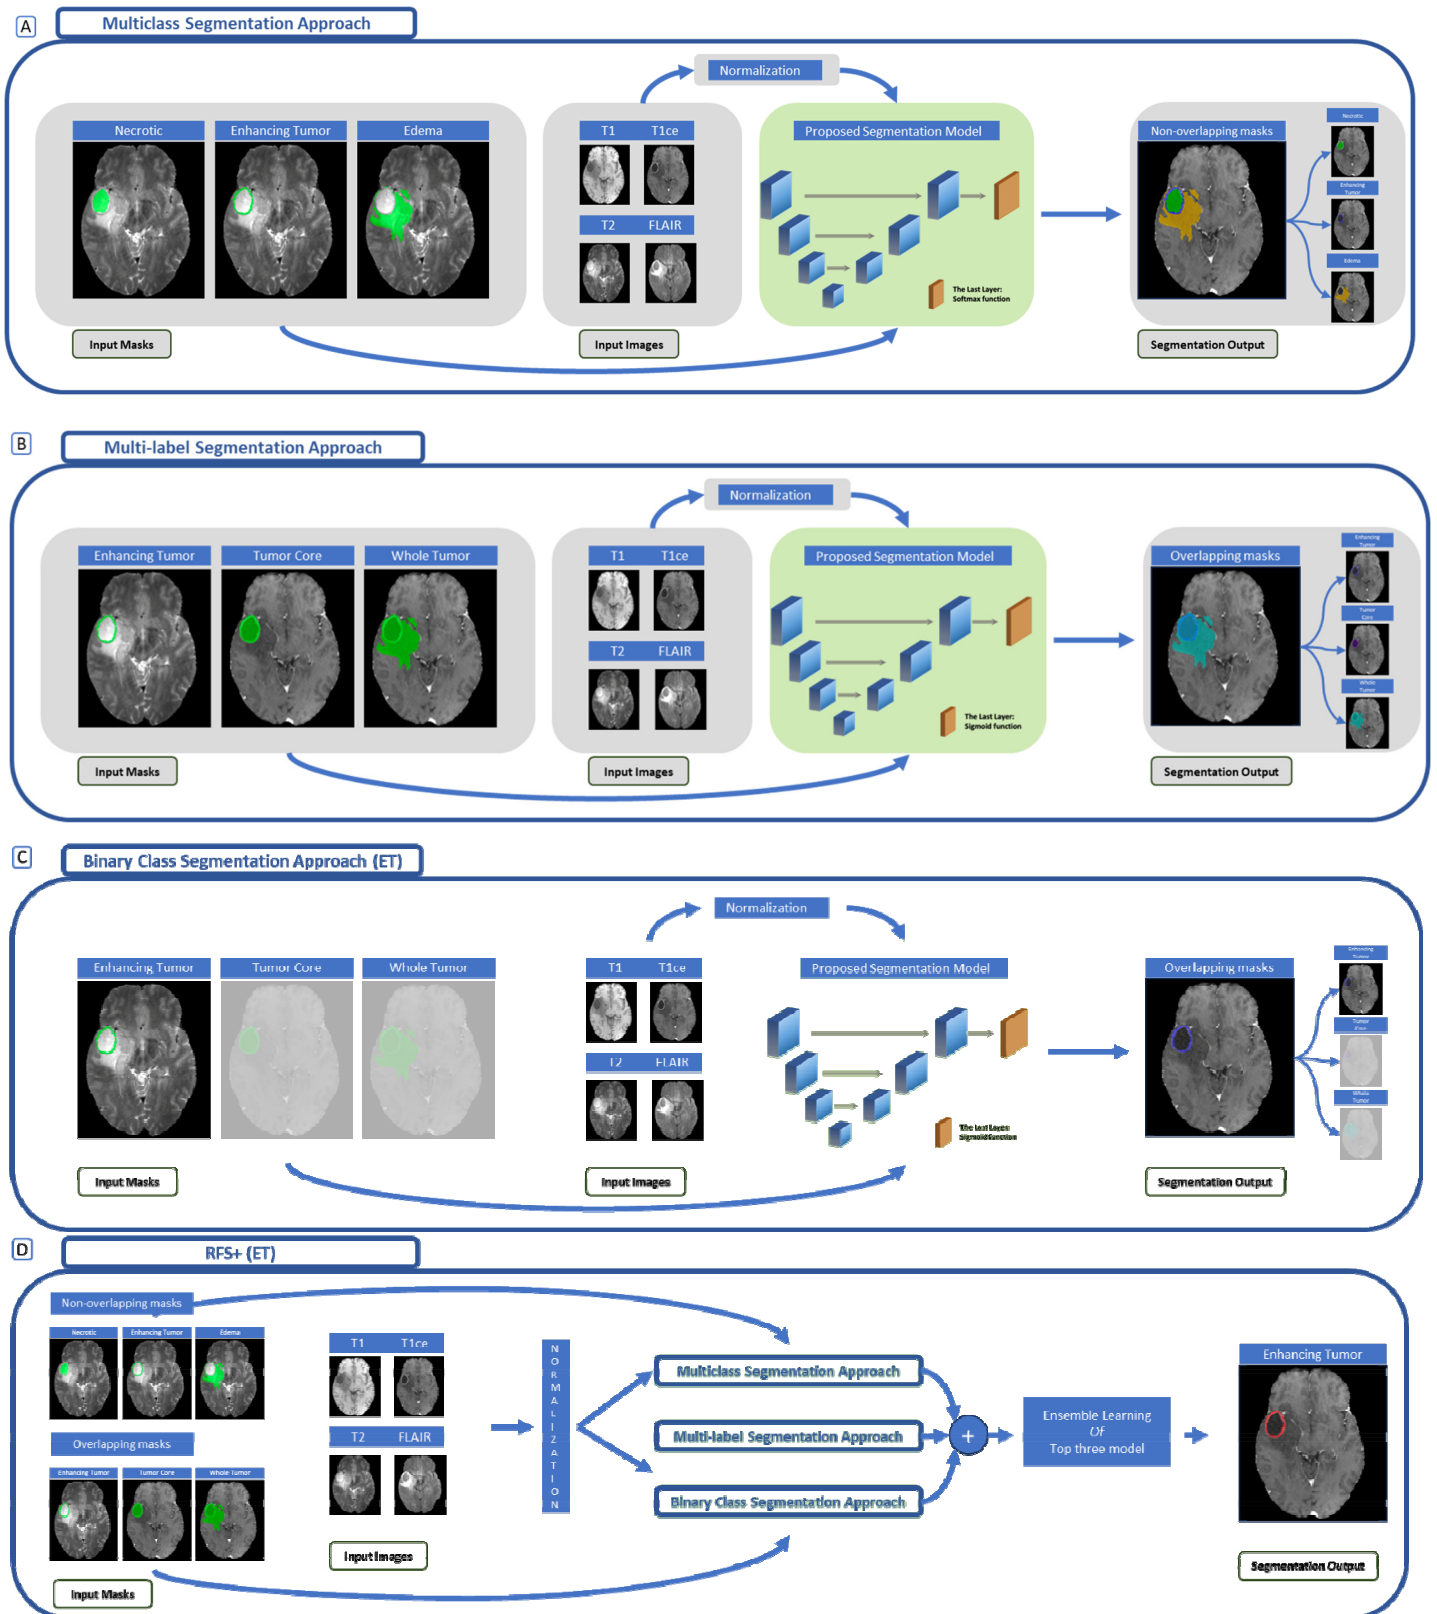

**Figure S4.** (A) Multiclass segmentation (B) Multi-label segmentation (C) Binary class segmentation (D) RFS+ for ET.

Figure S5 shows each segmentation approaches with their respective inputs and RFS+ for TC.

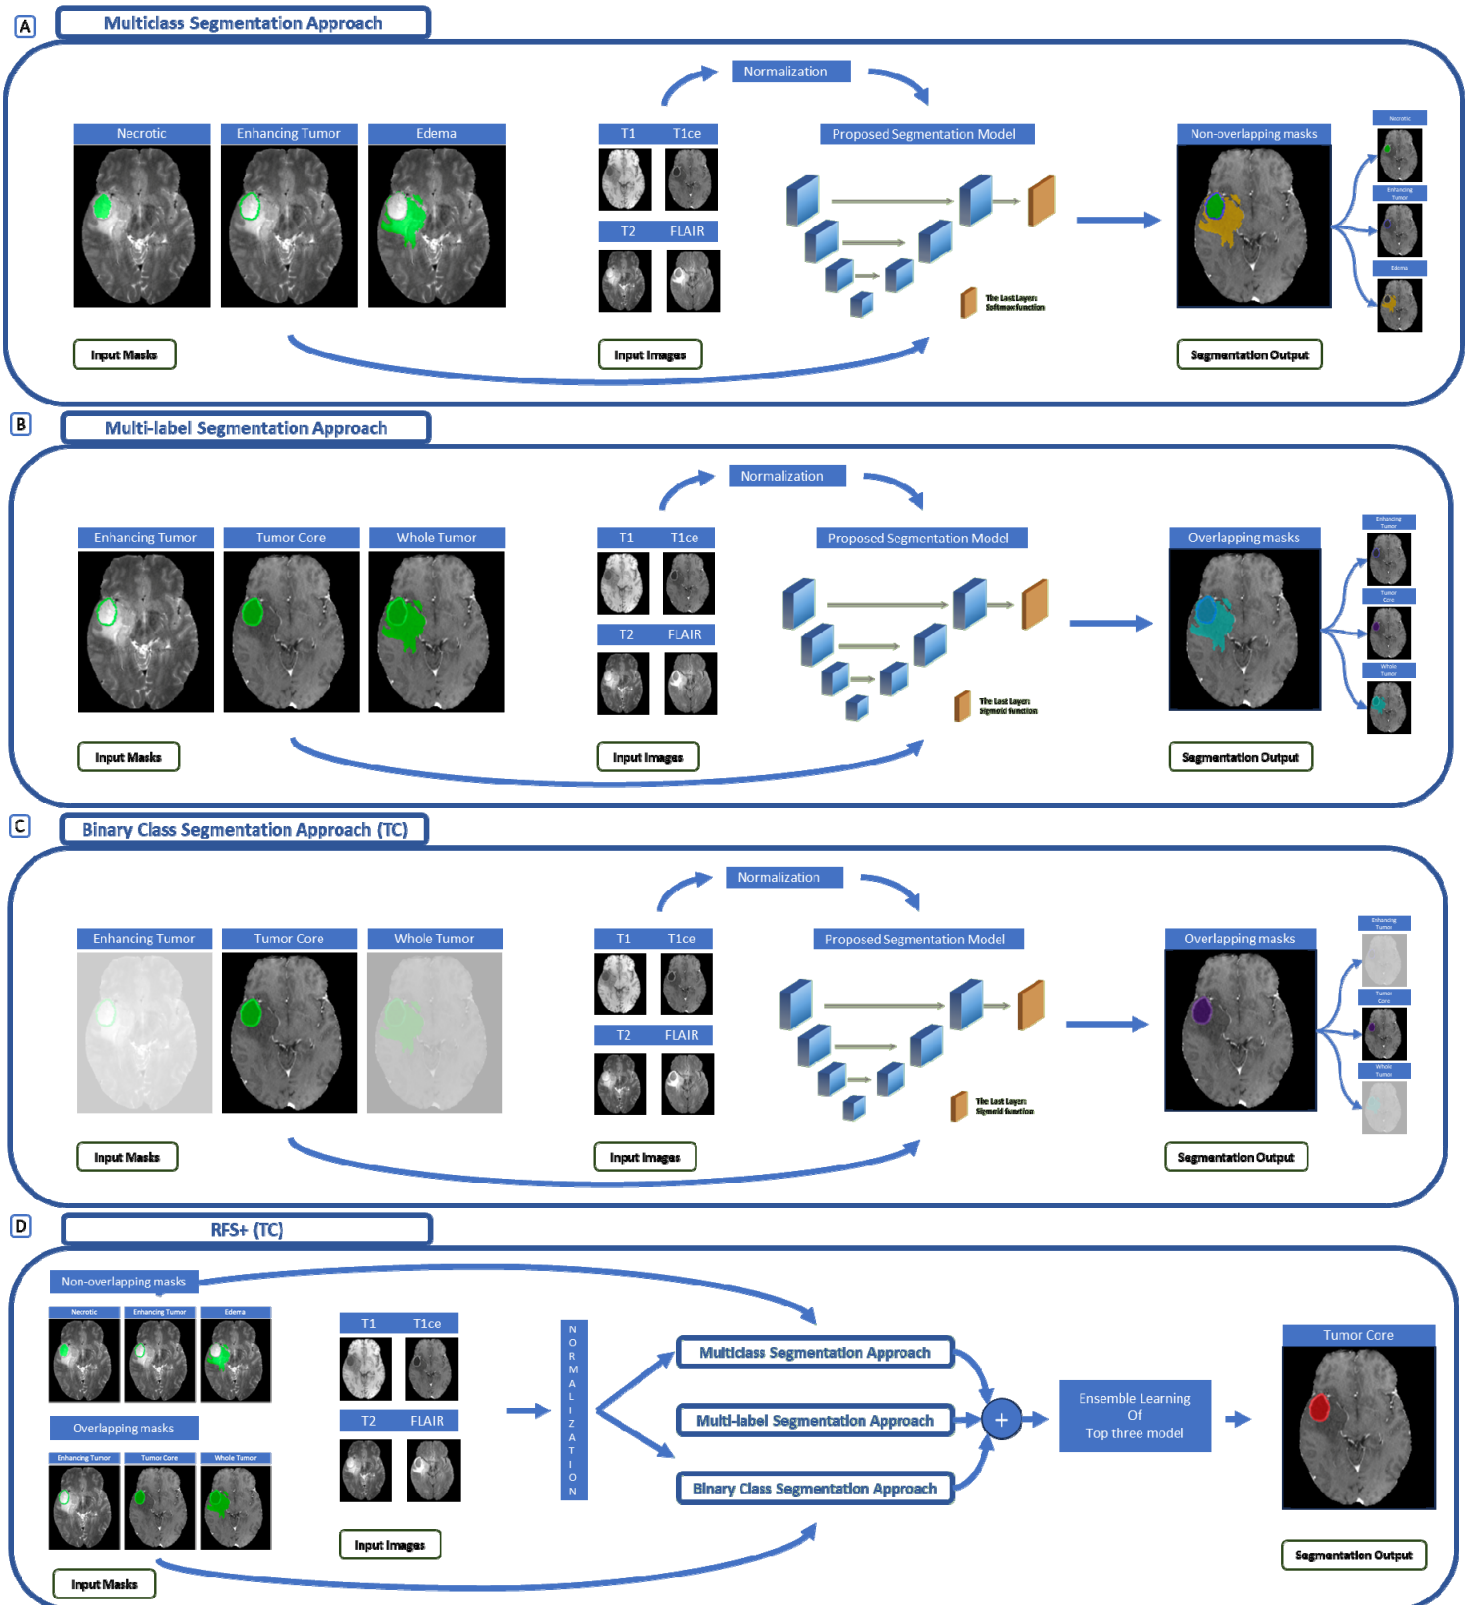

**Figure S5.** (A) Multiclass segmentation (B) Multi-label segmentation (C) Binary class segmentation (D) RFS+ for TC.

Figure S6 shows each segmentation approaches with their respective inputs and RFS+ for WT.

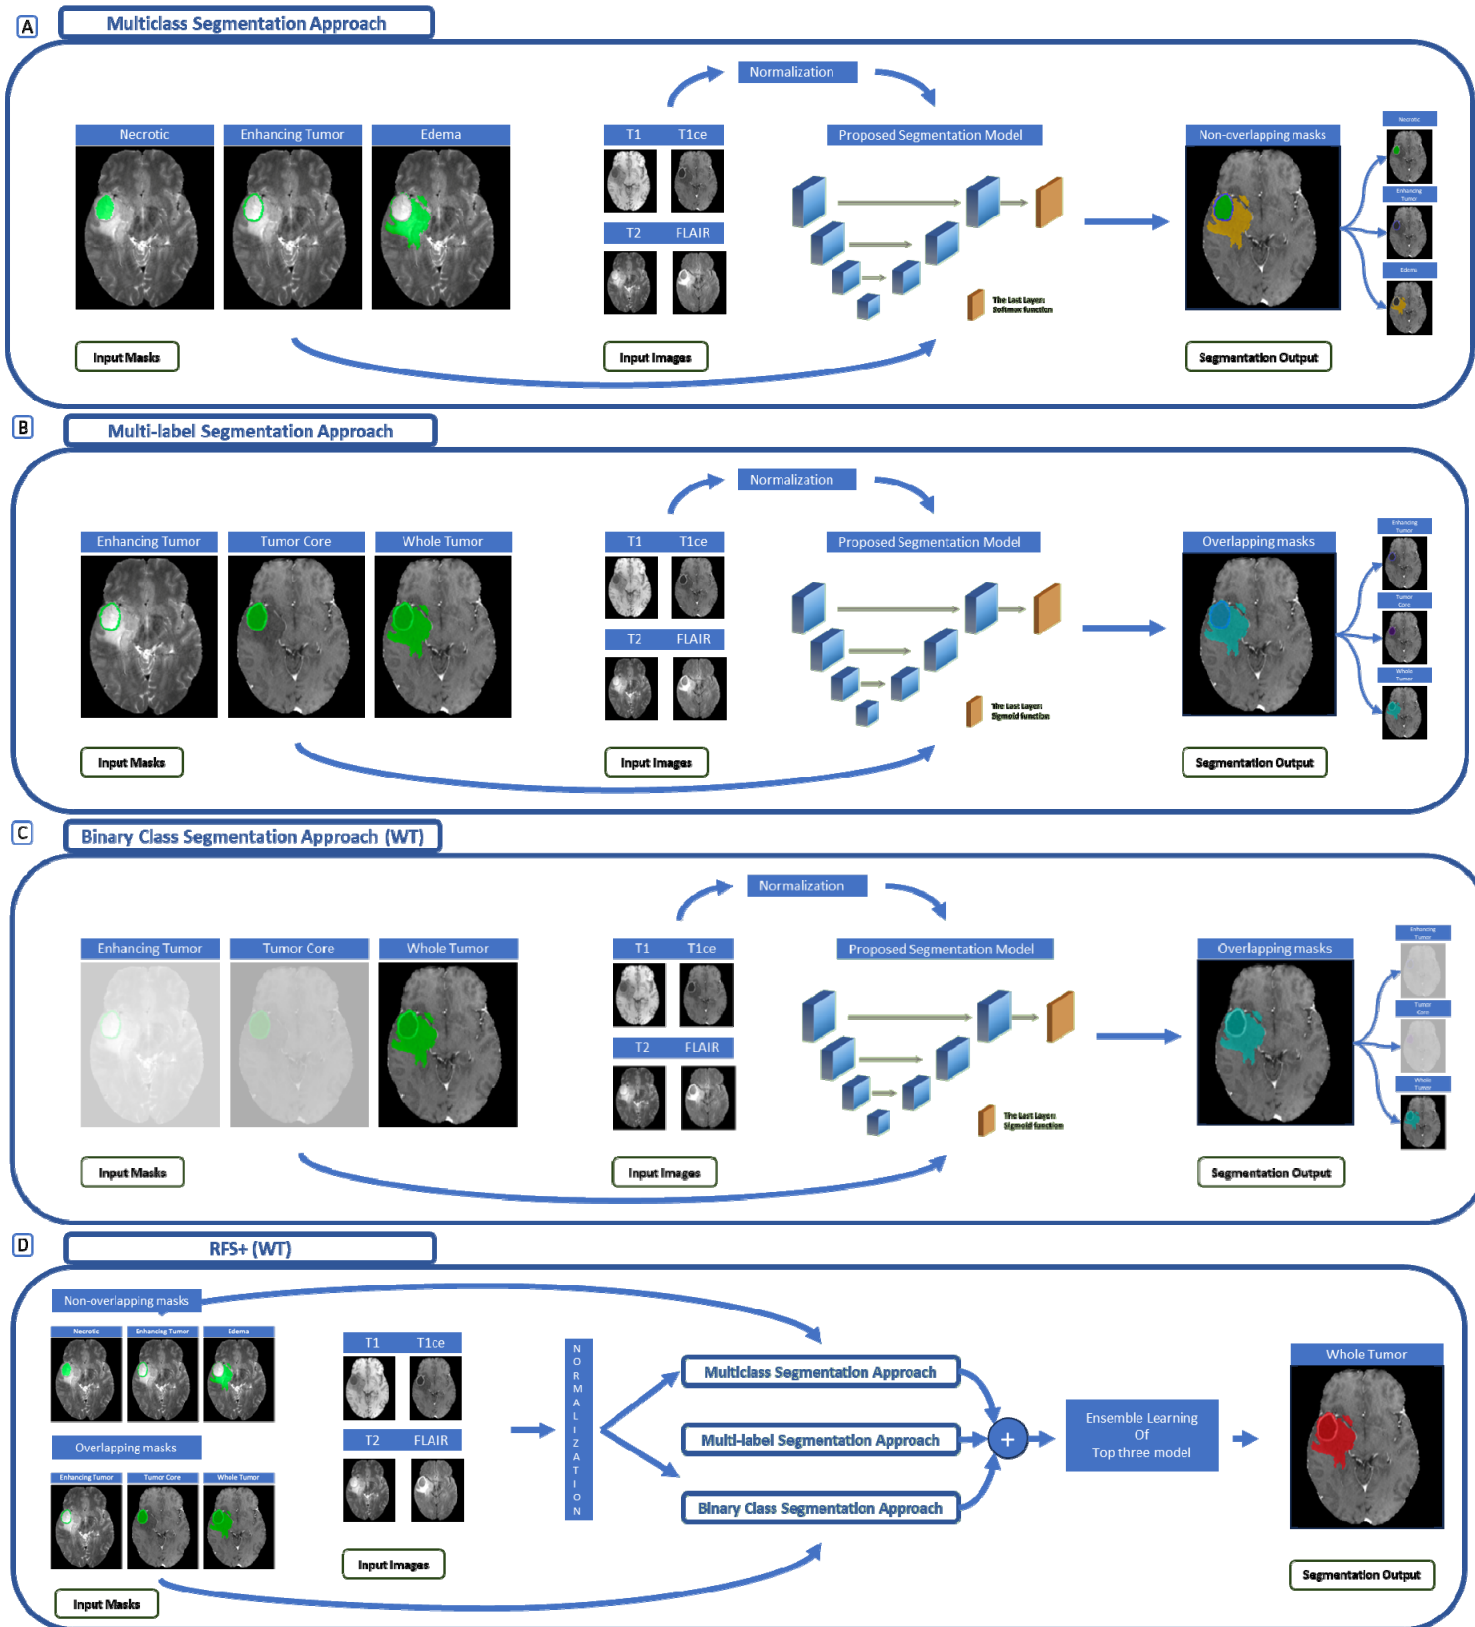

**Figure S6.** (A) Multiclass segmentation (B) Multi-label segmentation (C) Binary class segmentation (D) RFS+ for WT.

#### D Analyzing Training Requirements and Time Efficiency

Tables S2–S4 reveal that utilizing just 8GB of GPU memory and three days on an RTX 3090 is adequate to surpass the performance of the extended nnU-Net [2]. Notably,

the 2D U-Net model incorporating RFS+ demonstrates remarkable efficiency by requiring only 66% of the memory and completing training in 92% less time.

**Table S2.** The extended nnU-Net requirements.

|                      | Models                          | RTX 3070 8GB |              | RTX 3090 24 GB |              | The model number | Total Time (Days) |
|----------------------|---------------------------------|--------------|--------------|----------------|--------------|------------------|-------------------|
|                      |                                 | Trainable    | Time in Days | Trainable      | Time in Days |                  |                   |
| Ensemble             | BL baseline nnUNet              | -            | -            | X              | 5            | 5                | 25                |
|                      | BL+L+GN nnUNet with larger Unet | -            | -            | X              | 2            | 5                | 10                |
| The extended nnU-Net |                                 |              | -            |                |              |                  | 35                |

**Table S3.** The 2D U-Net with RFS+ requirements (Any region).

|          | Models                                        | RTX 3070 8GB |              | The model number | Total Time (Days) | RTX 3090 24 GB |              | The model number | Total Time (Days) |
|----------|-----------------------------------------------|--------------|--------------|------------------|-------------------|----------------|--------------|------------------|-------------------|
|          |                                               | Trainable    | Time in Days |                  |                   | Trainable      | Time in Days |                  |                   |
| Ensemble | 2D U-Net multiclass (Z-score normalization)   | X            | 3            | 1                | 3                 | X              | 1            | 1                | 1                 |
|          | 2D U-Net binary class (Z-score normalization) | X            | 3            | 1                | 3                 | X              | 1            | 1                | 1                 |
|          | 2D U-Net binary class (Nyul normalization)    | X            | 3            | 1                | 3                 | X              | 1            | 1                | 1                 |
| RFS+     |                                               |              |              |                  | 9                 |                |              |                  | 3                 |

**Table S4.** The comparison of the ensemble methods.

| Ensemble             | RTX 3070 8GB |              | RTX 3090 24 GB |              |
|----------------------|--------------|--------------|----------------|--------------|
|                      | Trainable    | Time in Days | Trainable      | Time in Days |
| The extended nnU-Net | -            | -            | X              | 35           |
| RFS+                 | x            | 9            | x              | 3            |

### E Acquisition Parametres retrieved from DICOM for STORM\_GLIO

|                    | T1            | T1ce          | T2            | FLAIR         |
|--------------------|---------------|---------------|---------------|---------------|
| Thickness/mm       | 4.77<br>+0.47 | 4.76<br>+0.47 | 4.74<br>+0.56 | 4.81<br>+0.39 |
| Repetition time/ms | 489<br>+96    | 494<br>+98    | 5627<br>+1856 | 8084<br>+1832 |
| Echo Time/ms       | 11<br>+2      | 11<br>+2      | 97<br>+8      | 112<br>+27    |
| Inversion Time/ms  | 0<br>+0       | 0<br>+0       | 0<br>+0       | 2217<br>+259  |
| Field Strength/T   | 1.54<br>+0.24 | 1.5<br>+0     | 1.54<br>+0.24 | 1.54<br>+0.24 |
| Rows               | 426<br>+145   | 424<br>+146   | 546<br>+185   | 475<br>+219   |
| Columns            | 417<br>+147   | 415<br>+148   | 527<br>+198   | 458<br>+232   |
| Pixel spacing/mm   | 0.62<br>+0.19 | 0.62<br>+0.19 | 0.48<br>+0.14 | 0.59<br>+0.21 |
| Slice Spacing/mm   | 5.99<br>+0.73 | 5.98<br>+0.74 | 6.27<br>+0.96 | 6.34<br>+0.72 |
| SAR                | 1.09<br>+0.77 | 1.07+<br>0.76 | 0.91<br>+0.53 | 0.69<br>+0.67 |

### References

1. J.C. Reinhold, B.E. Dewey, A. Carass, J.L. Prince, Evaluating the impact of intensity normalization on MR image synthesis, in: Medical Imaging 2019: Image Processing, SPIE, 2019: pp. 890–898.
2. H.M. Luu, S.-H. Park, Extending nn-UNet for Brain Tumor Segmentation, in: A. Crimi, S. Bakas (Eds.), Brainlesion: Glioma, Multiple Sclerosis, Stroke and Traumatic Brain Injuries, Springer International Publishing, Cham, 2022: pp. 173–186.
